# Supplementary material for: Use of deuterium labelling—evidence of graphene hydrogenation by reduction of graphite oxide using aluminium in sodium hydroxide
Source: Royal Society of Chemistry journal article supplement (doi:10.1039/c4ra16794e), 2015-01-01
Supplement: c4ra16794e1.pdf [file c4ra16794e1.pdf]

ARTICLE

## Use of deuterium labelling – evidence of graphene hydrogenation by reduction of graphite oxide using aluminium in sodium hydroxide

Cite this: DOI: 10.1039/x0xx00000x

Received 00th January 2012,  
Accepted 00th January 2012

Ondřej Jankovský<sup>a</sup>, Petr Šimek<sup>a</sup>, Michal Nováček<sup>a</sup>, Jan Luxa<sup>a</sup>, David Sedmidubský<sup>a</sup>,  
Martin Pumera<sup>b</sup>, Anna Macková<sup>c,d</sup>, Romana Mikšová<sup>c,d</sup> and Zdeněk Sofer<sup>\*a</sup>

DOI: 10.1039/x0xx00000x

www.rsc.org/

## SUPPORTING INFORMATION

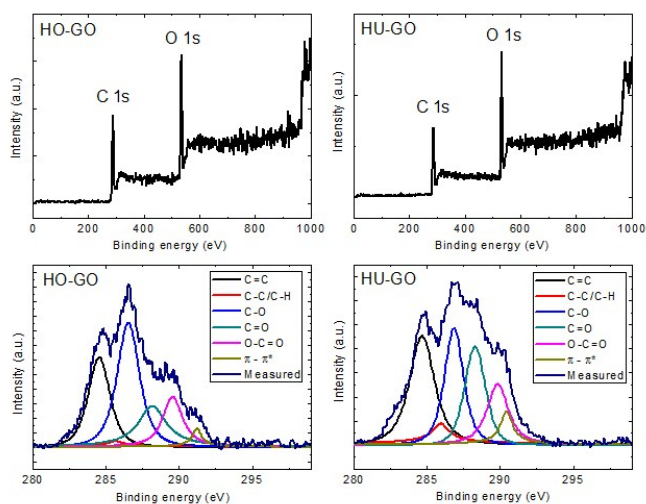

**Fig. S11** The Survey spectra of starting graphite oxide (upper images) and the corresponding high resolution XPS spectra of C 1s peak (lower images).

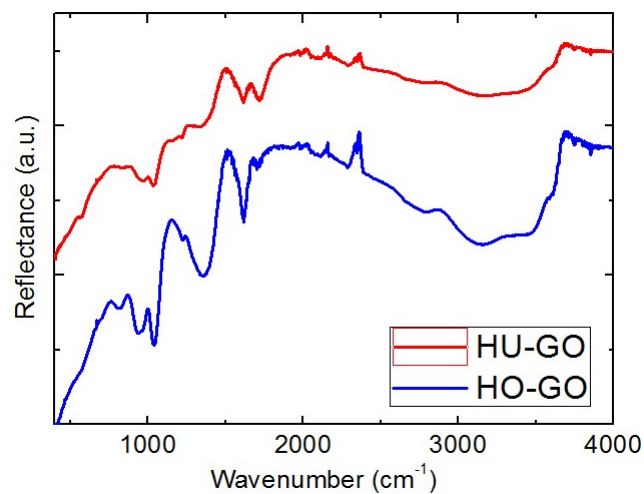

**Fig. S12** FT-IR spectra of the starting graphite oxide.

**Table SI A** The results of C 1s peak deconvolution with a quantification of different carbon bonding states for the starting graphite oxide material.

| Sample        | HO-GO | HU-GO |
|---------------|-------|-------|
| C=C           | 24.6  | 28.3  |
| C-C/C-H       | 2.5   | 8.4   |
| C-O           | 36.3  | 22.5  |
| C=O           | 18.4  | 19.5  |
| O-C=O         | 14.6  | 14.5  |
| $\pi - \pi^*$ | 3.6   | 6.8   |

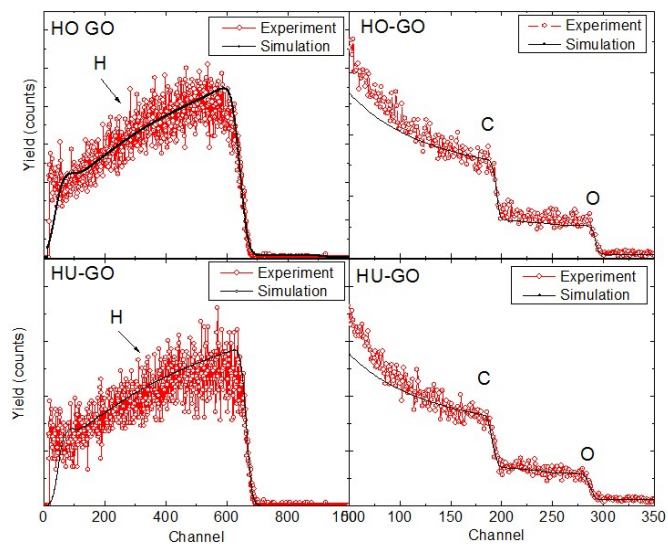

**Fig. S13** ERDA (left) and RBS (right) spectra of the starting graphite oxide. The composition of HO-GO is 71.4 at.% C, 19.9 at.% O and 8.7 at.% H. The composition of HU-GO is 72.9 at.% C, 17.8 at.% O and 9.3 at.% H.
